# Supplementary material
Source: Springer Nature journal article supplement (https://www.springermedizin.de/resource/supplementary/13075_2004_1577_MOESM4_ESM.pdf/9690090)

(a) Anti-Cit-RSA IgG

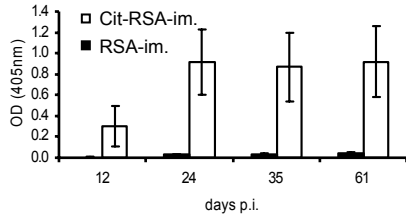

(b) Anti-RSA IgG

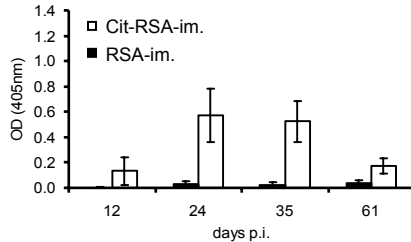

Supplement: MOESM4 [file 9690090]
